# Supplementary material
Source: Springer Nature journal article supplement (https://www.springermedizin.de/resource/supplementary/13017_2008_99_MOESM4_ESM.pdf/9635466)

**Leukocytes**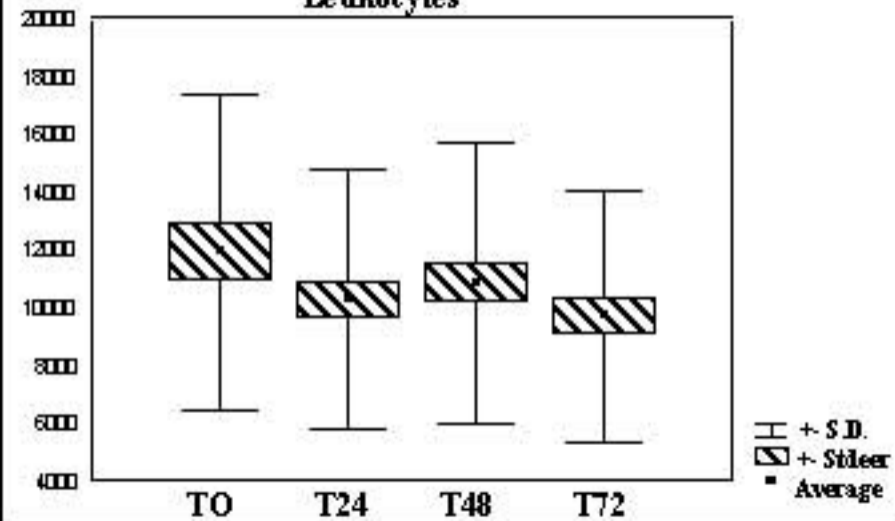**Neutrophils**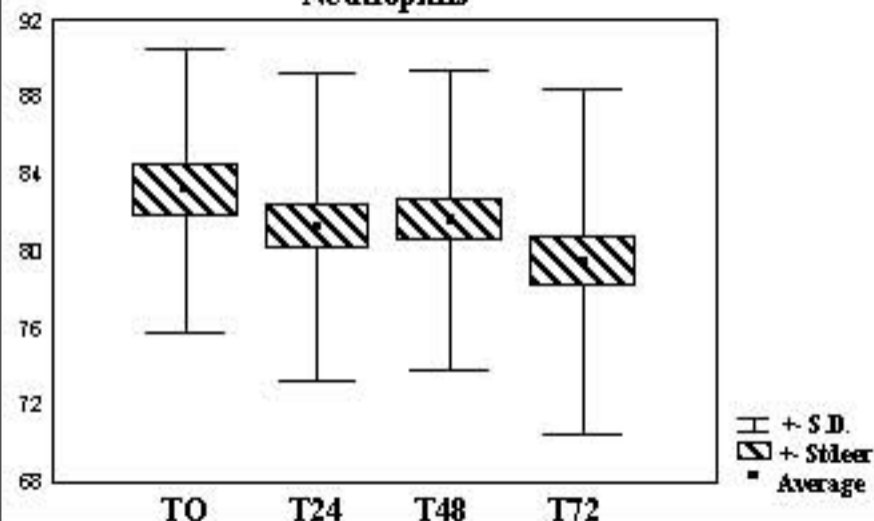**Band neutrophil**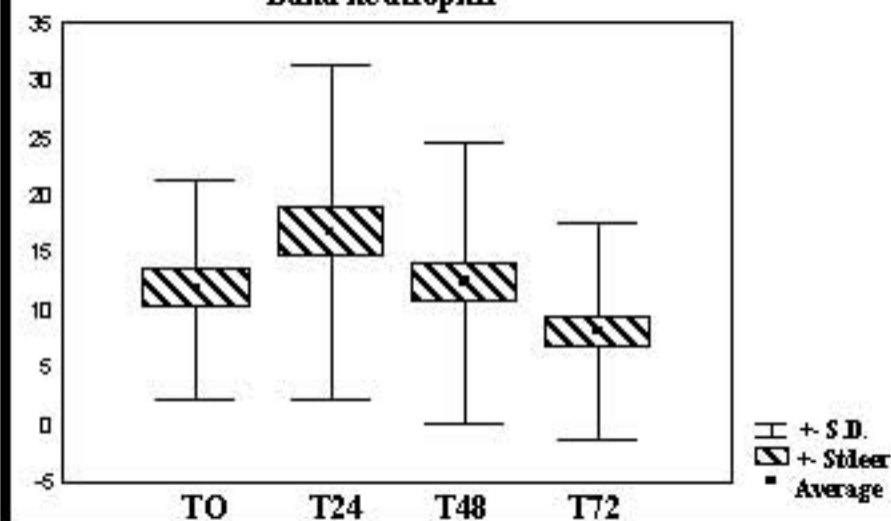

Supplement: MOESM4 [file 9635466]
